# Supplementary material
Source: PubMed Central journal article supplement (PMC4336190)
Supplement: NIHMS662001-supplement-Supporting_Information.pdf [file NIHMS662001-supplement-Supporting_Information.pdf]

## **SUPPLEMENTAL INFORMATION**

### **Title:**

Exposures to Transit and Other Sources of Noise Among New York City Residents

### **Authors:**

Richard L. Neitzel, PhD<sup>1\*</sup>, Robyn R.M. Gershon, DrPH<sup>2</sup>, Tara P. McAlexander, BA<sup>3</sup>, Lori A. Magda, MA<sup>3</sup>, and Julie M. Pearson, MPH<sup>3</sup>

- 1 Risk Science Center, Department of Environmental Health Sciences, University of Michigan, Ann Arbor MI 48109
- 2 Philip R Lee Institute for Health Policy, University of California, San Francisco, San Francisco CA 94143
- 3 Department of Sociomedical Sciences, Columbia University, New York NY 10032

1 Table, 7 pages

Table S1.  $L_{EQ}$  noise levels assigned based on review of peer-reviewed literature

| Source/Industry                        | Assigned $L_{EQ}$ | References             |
|----------------------------------------|-------------------|------------------------|
| Transit                                |                   | [1]                    |
| Rail                                   |                   |                        |
| Platform                               | 78.2              |                        |
| Vehicle                                | 80.1              |                        |
| Bus                                    |                   |                        |
| Platform                               | 75.3              |                        |
| Vehicle                                | 76                |                        |
| Ferry                                  |                   |                        |
| Platform                               | 77.7              |                        |
| Vehicle                                | 72.9              |                        |
| Occupational                           |                   |                        |
| Agriculture                            | 89.8              | [2-5]                  |
| Construction                           | 88.1              | [6-9]                  |
| Education/Research                     | 79.3              | [7, 10-12]             |
| Entertainment                          | 88.0              | [11, 13-16]            |
| Food services                          | 79.7              | [11, 17, 18]           |
| Healthcare                             | 70.7              | [11, 19-23]            |
| Landscaping                            | 86.6              | [14]                   |
| Maintenance                            | 82.0              | [11, 24, 25]           |
| Manufacturing                          | 89.1              | [7, 8, 24-28]          |
| Military                               | 90.5              | [29, 30]               |
| Professional                           | 71.9              | [7, 10-12]             |
| Retail                                 | 78.1              | [10, 11, 14]           |
| Transportation                         | 83.8              | [11, 31-35]            |
| Utility                                | 82.6              | [18, 36-38]            |
| Homemaker, retired,<br>or unemployed   | 70                |                        |
| Nonoccupational                        |                   |                        |
| Play in band                           | 97.4              | [11, 16, 39, 40]       |
| Concerts                               | 96.0              | [11, 15, 41-43]        |
| Sporting events                        | 92.6              | [11, 14, 41, 44-46]    |
| Power tools                            | 90.8              | [47-49]                |
| Motorcycle                             | 100.0             | [50]                   |
| MP3 players & stereos                  | 86.2              | [11, 51-53]            |
| Home/other miscellaneous<br>activities | 58.2              | [7, 10-12, 14, 48, 54] |

All values are mean  $L_{EQS}$  (or midpoints, where means were not reported)

## SUPPLEMENTAL INFORMATION REFERENCES

1. Neitzel, R.; Gershon, R. R.; Zeltser, M.; Canton, A.; Akram, M., Noise levels associated with New York City's mass transit systems. *Am J Public Health* **2009**, *99*, (8), 1393-9.
2. McBride, D. I.; Firth, H. M.; Herbison, G. P., Noise exposure and hearing loss in agriculture: a survey of farmers and farm workers in the Southland region of New Zealand. *J Occup Environ Med* **2003**, *45*, (12), 1281-8.
3. Miyakita, T.; Ueda, A.; Futatsuka, M.; Inaoka, T.; Nagano, M.; Koyama, W., Noise exposure and hearing conservation for farmers of rural Japanese communities. *J Sound Vib* **2004**, *277*, 633-641.
4. Neitzel, R.; Yost, M., Task-based assessment of occupational vibration and noise exposures in forestry workers. *AIHA J (Fairfax, Va)* **2002**, *63*, (5), 617-27.
5. Neitzel, R. L.; Berna, B. E.; Seixas, N. S., Noise exposures aboard catcher/processor fishing vessels. *Am J Ind Med* **2006**, *49*, (8), 624-33.
6. Neitzel, R.; Stover, B.; Seixas, N., Longitudinal assessment of noise exposure in a cohort of construction workers. *Ann Occup Hyg* **2011**, *Submitted Jan 2011*.
7. Kock, S.; Andersen, T.; Kolstad, H. A.; Kofoed-Nielsen, B.; Wiesler, F.; Bonde, J. P., Surveillance of noise exposure in the Danish workplace: a baseline survey. *Occup Environ Med* **2004**, *61*, (10), 838-43.
8. Daniell, W. E.; Swan, S. S.; McDaniel, M. M.; Camp, J. E.; Cohen, M. A.; Stebbins, J. G., Noise exposure and hearing loss prevention programmes after 20 years of regulations in the United States. *Occup Environ Med* **2006**, *63*, (5), 343-51.
9. Gillis, H.; Harrison, C., Hearing levels and hearing protection use in the British Columbia construction industry - 1988-1997. *Report by the Workers' Compensation Board of British Columbia* **1998**.
10. Zheng, D.; Cai, X.; Song, H.; Chen, T., Study on personal noise exposure in China. *Appl Acoust* **1996**, *48*, (1), 59-70.
11. Diaz, C.; Pedrero, A., Sound exposure during daily activities. *Appl Acoust* **2006**, *67*, 271-283.
12. Orlando, P.; Perdelli, F.; Cristina, M. L.; Piromalli, W., Environmental and personal monitoring of exposure to urban noise and community response. *Eur J Epidemiol* **1994**, *10*, (5), 549-54.

13. Sadhra, S.; Jackson, C.; Ryder, T.; Brown, M., Noise exposure and hearing loss among student employees working in university entertainment venues. *Ann Occup Hyg* **2002**, *46*, (5), 455-463.
14. Neitzel, R.; Seixas, N.; Olson, J.; Daniell, W.; Goldman, B., Nonoccupational noise: exposures associated with routine activities. *J Acoust Soc Am* **2004**, *115*, (1), 237-45.
15. Gunderson, E.; Moline, J.; Catalano, P., Risks of developing noise-induced hearing loss in employees of urban music clubs. *Am J Ind Med* **1997**, *31*, (1), 75-9.
16. Bray, A.; Szymanski, M.; Mills, R., Noise induced hearing loss in dance music disc jockeys and an examination of sound levels in nightclubs. *J Laryngol Otol* **2004**, *118*, (2), 123-8.
17. Achutan, C., Assessment of noise exposure in a hospital kitchen. *Noise Health* **2009**, *11*, (44), 145-50.
18. Yassi, A.; Gaborieau, D.; Gillespie, I.; Elias, J., The noise hazard in a large health care facility. *J Occup Med* **1991**, *33*, (10), 1067-70.
19. Busch-Vishniac, I. J.; West, J. E.; Barnhill, C.; Hunter, T.; Orellana, D.; Chivukula, R., Noise levels in Johns Hopkins Hospital. *J Acoust Soc Am* **2005**, *118*, (6), 3629-45.
20. Matook, S. A.; Sullivan, M. C.; Salisbury, A.; Miller, R. J.; Lester, B. M., Variations of NICU sound by location and time of day. *Neonatal Netw* *29*, (2), 87-95.
21. Soucy, F.; Ko, R.; Denstedt, J. D.; Razvi, H., Occupational noise exposure during endourologic procedures. *J Endourol* **2008**, *22*, (8), 1609-11.
22. Holmberg, S. K.; Coon, S., Ambient sound levels in a state psychiatric hospital. *Arch Psychiatr Nurs* **1999**, *13*, (3), 117-26.
23. Balogh, D.; Kittinger, E.; Benzer, A.; Hackl, J. M., Noise in the ICU. *Intensive Care Med* **1993**, *19*, (6), 343-6.
24. Virji, M. A.; Woskie, S. R.; Waters, M.; Brueck, S.; Stancescu, D.; Gore, R.; Estill, C.; Prince, M., Agreement between task-based estimates of the full-shift noise exposure and the full-shift noise dosimetry. *Ann Occup Hyg* **2009**, *53*, (3), 201-14.
25. Neitzel, R.; Somers, S.; Seixas, N., Variability of real-world hearing protector attenuation measurements. *Ann Occup Hyg* **2006**, *50*, (7), 679-91.

26. Davies, H. W.; Teschke, K.; Kennedy, S. M.; Hodgson, M. R.; Demers, P. A., Occupational noise exposure and hearing protector use in Canadian lumber mills. *J Occup Environ Hyg* **2009**, *6*, (1), 32-41.
27. Arezes, P.; Miguel, A., Hearing protectors acceptability in noisy environments. *Ann Occup Hyg* **2002**, *46*, (6), 531-536.
28. Sriwattanatamma, P.; Breyse, P., Comparison of NIOSH noise criteria and OSHA hearing conservation criteria. *Am J Ind Med* **2000**, *37*, (4), 334-8.
29. Kryter, K. D., Hearing loss from gun and railroad noise--relations with ISO standard 1999. *J Acoust Soc Am* **1991**, *90*, (6), 3180-95.
30. Tufts, J. B.; Weathersby, P. K.; Marshall, L., Estimation of equivalent noise exposure level using hearing threshold levels of a population. *Ear Hear* **2009**, *30*, (2), 287-90.
31. Neitzel, R.; Daniell, W.; Sheppard, L.; Davies, H.; Seixas, N., Comparison of perceived and quantitative measures of occupational noise exposure. *Ann Occup Hyg* **2009**, *53*, (1), 41-54.
32. Bagshaw, M.; Lower, M., Hearing loss on the flight deck - origin and remedy. *Aeronaut J* **2002**, 277-289.
33. Seshagiri, B., Occupational noise exposure of operators of heavy trucks. *Am Ind Hyg Assoc J* **1998**, *59*, (3), 205-13.
34. Seshagiri, B., Exposure to noise on board locomotives. *AIHA J (Fairfax, Va)* **2003**, *64*, (5), 699-707.
35. Svendsen, K.; Borresen, E., Measurements of mineral oil mist, hydrocarbon vapor, and noise in engine rooms of ships. *Appl Occup Environ Hyg* **1999**, *14*, (3), 186-91.
36. Patel, J. A.; Broughton, K., Assessment of the noise exposure of call centre operators. *Ann Occup Hyg* **2002**, *46*, (8), 653-61.
37. Burgess, G. L.; Dippnall, W. M.; Ravandi, M. R.; Cherry, N. M., Retrospective noise estimates for British nuclear workers using an alternative approach. *Ann Occup Hyg* **2004**, *48*, (2), 117-27.
38. Tolvanen, O. K., Exposure to bioaerosols and noise at a Finnish dry waste treatment plant. *Waste Manag Res* **2004**, *22*, (5), 346-57.
39. Barlow, C., Potential hazard of hearing damage to students in undergraduate popular music courses. *Med Probl Perform Art* **25**, (4), 175-82.

40. Qian, C.; Behar, A.; Wong, W., Noise exposure of musicians of a ballet orchestra. *Noise Health* **2010**, *13*, (50), 59-63.
41. Axelsson, A., Recreational noise exposure and its effects. *Noise Control Eng J* **1996**, *44*, (3), 127-134.
42. Williams, W.; Beach, E. F.; Gilliver, M., Clubbing: the cumulative effect of noise exposure from attendance at dance clubs and night clubs on whole-of-life noise exposure. *Noise Health* *12*, (48), 155-8.
43. Mercier, V.; Luy, D.; Hohmann, B. W., The sound exposure of the audience at a music festival. *Noise Health* **2003**, *5*, (19), 51-8.
44. Engard, D. J.; Sandfort, D. R.; Gotshall, R. W.; Brazile, W. J., Noise exposure, characterization, and comparison of three football stadiums. *J Occup Environ Hyg* *7*, (11), 616-21.
45. Swanepoel, d. W.; 3rd, H. J., Football match spectator sound exposure and effect on hearing: a pretest-post-test study. *S Afr Med J* **2010**, *100*, (4), 239-42.
46. Rose, A. S.; Ebert, C. S., Jr.; Prazma, J.; Pillsbury, H. C., 3rd, Noise exposure levels in stock car auto racing. *Ear Nose Throat J* **2008**, *87*, (12), 689-92.
47. McClymont, L. G.; Simpson, D. C., Noise levels and exposure patterns to do-it-yourself power tools. *J Laryngol Otol* **1989**, *103*, (12), 1140-1.
48. Jokitulppo, J. S.; Bjork, E. A.; Akaan-Penttila, E., Estimated leisure noise exposure and hearing symptoms in Finnish teenagers. *Scand Audiol* **1997**, *26*, (4), 257-62.
49. Mallick, Z.; Badruddin, I. A.; Khaleed Hussain, M. T.; Salman Ahmed, N. J.; Kanesan, J., Noise characteristics of grass-trimming machine engines and their effect on operators. *Noise Health* **2009**, *11*, (43), 98-102.
50. McCombe, A. W.; Binnington, J.; Nash, D., Two solutions to the problem of noise exposure for motorcyclists. *Occup Med (Lond)* **1994**, *44*, (5), 239-42.
51. Williams, W., Noise exposure levels from personal stereo use. *Int J Audiol* **2005**, *44*, (4), 231-6.
52. Airo, E.; Pekkarinen, J.; Olkinuora, P., Listening to music with earphones: an assessment of noise exposure. *Acustica* **1996**, *82*, 885-894.
53. Levey, S.; Levey, T.; Fligor, B. J., Noise Exposure Estimates of Urban MP3 Player Users. *J Speech Lang Hear Res* **2011**.

54. Serra, M. R.; Biassoni, E. C.; Richter, U.; Minoldo, G.; Franco, G.; Abraham, S.; Carignani, J. A.; Joeques, S.; Yacci, M. R., Recreational noise exposure and its effects on the hearing of adolescents. Part I: an interdisciplinary long-term study. *Int J Audiol* **2005**, *44*, (2), 65-73.
